# Supplementary material for: Resveratrol Treatment Prevents Increase of Mast Cells in Both Murine OVA Enteritis and IL-10−/− Colitis
Source: MDPI journal article supplement (doi:10.3390/ijms23031213), 2022-01-21
Supplement: s1 [file s1]

# Figure S1

**A**

**B**

| Stool score (OVA) |        |        |         |     |     |     | Tissue damage (OVA) |         |        |        |     |     |     |
|-------------------|--------|--------|---------|-----|-----|-----|---------------------|---------|--------|--------|-----|-----|-----|
| <i>p-Value</i>    | C+W    | C+E    | C+R     | O+W | O+E | O+R | <i>p-Value</i>      | C+W     | C+E    | C+R    | O+W | O+E | O+R |
| C+W               | -      | -      | -       | -   | -   | -   | C+W                 | -       | -      | -      | -   | -   | -   |
| C+E               | ns     | -      | -       | -   | -   | -   | C+E                 | ns      | -      | -      | -   | -   | -   |
| C+R               | ns     | ns     | -       | -   | -   | -   | C+R                 | ns      | ns     | -      | -   | -   | -   |
| O+W               | < 0.01 | < 0.01 | < 0.001 | -   | -   | -   | O+W                 | < 0.001 | < 0.01 | < 0.01 | -   | -   | -   |
| O+E               | ns     | ns     | ns      | ns  | -   | -   | O+E                 | < 0.01  | ns     | ns     | ns  | -   | -   |
| O+R               | ns     | ns     | < 0.05  | ns  | ns  | -   | O+R                 | < 0.05  | ns     | ns     | ns  | ns  | -   |

**Figure S1.** P-values corresponding to Figure 1 showing stool score (**A**) and tissue damage (**B**) in OVA-treated mice. Mice received water (W), 50 mg/kg bodyweight (BW) ethanol (E) or 50 mg/kg BW resveratrol (R) via drinking water for 28 days and were intraperitoneally (i.p.) sensitized with 50 µg Ovalbumin (OVA, (O)) in alum (1:2) on day 5 and 11 and further treated with or without (control, (C)) 50 mg OVA orally on day 15, 18, 20, 22, 24 and 27. Group size was n = 8, respectively.

Figure S2

A

| MC/mm <sup>2</sup> in Duodenum (OVA) |         |        |         |     |         |     |
|--------------------------------------|---------|--------|---------|-----|---------|-----|
| <i>p</i> -Value                      | C+W     | C+E    | C+R     | O+W | O+E     | O+R |
| C+W                                  | -       | -      | -       | -   | -       | -   |
| C+E                                  | ns      | -      | -       | -   | -       | -   |
| C+R                                  | ns      | ns     | -       | -   | -       | -   |
| O+W                                  | < 0.01  | ns     | < 0.01  | -   | -       | -   |
| O+E                                  | < 0.001 | < 0.01 | < 0.001 | ns  | -       | -   |
| O+R                                  | ns      | ns     | ns      | ns  | < 0.001 | -   |

B

| MC/mm <sup>2</sup> in Colon (OVA) |         |        |         |        |         |     |
|-----------------------------------|---------|--------|---------|--------|---------|-----|
| <i>p</i> -Value                   | C+W     | C+E    | C+R     | O+W    | O+E     | O+R |
| C+W                               | -       | -      | -       | -      | -       | -   |
| C+E                               | ns      | -      | -       | -      | -       | -   |
| C+R                               | ns      | ns     | -       | -      | -       | -   |
| O+W                               | < 0.01  | < 0.01 | < 0.001 | -      | -       | -   |
| O+E                               | < 0.001 | < 0.01 | < 0.001 | ns     | -       | -   |
| O+R                               | ns      | ns     | ns      | < 0.05 | < 0.001 | -   |

C

| Relative <i>Mcpt4</i> mRNA expression (OVA) |     |     |        |     |     |     |
|---------------------------------------------|-----|-----|--------|-----|-----|-----|
| <i>p</i> -Value                             | C+W | C+E | C+R    | O+W | O+E | O+R |
| C+W                                         | -   | -   | -      | -   | -   | -   |
| C+E                                         | ns  | -   | -      | -   | -   | -   |
| C+R                                         | ns  | ns  | -      | -   | -   | -   |
| O+W                                         | ns  | ns  | < 0.05 | -   | -   | -   |
| O+E                                         | ns  | ns  | ns     | ns  | -   | -   |
| O+R                                         | ns  | ns  | ns     | ns  | ns  | -   |

D

| Relative <i>Mc-cpa</i> mRNA expression (OVA) |        |        |        |     |     |     |
|----------------------------------------------|--------|--------|--------|-----|-----|-----|
| <i>p</i> -Value                              | C+W    | C+E    | C+R    | O+W | O+E | O+R |
| C+W                                          | -      | -      | -      | -   | -   | -   |
| C+E                                          | ns     | -      | -      | -   | -   | -   |
| C+R                                          | ns     | ns     | -      | -   | -   | -   |
| O+W                                          | < 0.05 | < 0.05 | < 0.05 | -   | -   | -   |
| O+E                                          | ns     | ns     | ns     | ns  | -   | -   |
| O+R                                          | ns     | ns     | ns     | ns  | ns  | -   |

E

| Relative <i>Il3ra</i> mRNA expression (OVA) |     |        |        |        |     |     |
|---------------------------------------------|-----|--------|--------|--------|-----|-----|
| <i>p</i> -Value                             | C+W | C+E    | C+R    | O+W    | O+E | O+R |
| C+W                                         | -   | -      | -      | -      | -   | -   |
| C+E                                         | ns  | -      | -      | -      | -   | -   |
| C+R                                         | ns  | ns     | -      | -      | -   | -   |
| O+W                                         | ns  | < 0.05 | < 0.05 | -      | -   | -   |
| O+E                                         | ns  | ns     | ns     | ns     | -   | -   |
| O+R                                         | ns  | ns     | ns     | < 0.05 | ns  | -   |

**Figure S2.** P-values corresponding to Figure 2 showing MC numbers in duodenum (A) and colon (B), relative *Mcpt4* (C), *Mc-cpa* (D) and *Il3ra* (E) mRNA expression in OVA-treated mice. Mice received water (W), 50 mg/kg bodyweight (BW) ethanol (E) or 50 mg/kg BW resveratrol (R) via drinking water for 28 days and were intraperitoneally (i.p.) sensitized with 50 µg Ovalbumin (OVA, (O)) in alum (1:2) on day 5 and 11 and further treated with or without (control, (C)) 50 mg OVA orally on day 15, 18, 20, 22, 24 and 27. Group size was n = 8, respectively.

Figure S3

| A                                                      |         |         |         |                          |                          |                          | B                                                   |        |        |        |                          |                          |                          |
|--------------------------------------------------------|---------|---------|---------|--------------------------|--------------------------|--------------------------|-----------------------------------------------------|--------|--------|--------|--------------------------|--------------------------|--------------------------|
| MC/mm <sup>2</sup> in Duodenum (IL-10 <sup>-/-</sup> ) |         |         |         |                          |                          |                          | MC/mm <sup>2</sup> in Colon (IL-10 <sup>-/-</sup> ) |        |        |        |                          |                          |                          |
| <i>p</i> -Value                                        | C + W   | C + E   | C + R   | IL-10 <sup>-/-</sup> + W | IL-10 <sup>-/-</sup> + E | IL-10 <sup>-/-</sup> + R | <i>p</i> -Value                                     | C + W  | C + E  | C + R  | IL-10 <sup>-/-</sup> + W | IL-10 <sup>-/-</sup> + E | IL-10 <sup>-/-</sup> + R |
| C + W                                                  | -       | -       | -       | -                        | -                        | -                        | C + W                                               | -      | -      | -      | -                        | -                        | -                        |
| C + E                                                  | ns      | -       | -       | -                        | -                        | -                        | C + E                                               | ns     | -      | -      | -                        | -                        | -                        |
| C + R                                                  | ns      | ns      | -       | -                        | -                        | -                        | C + R                                               | ns     | ns     | -      | -                        | -                        | -                        |
| IL-10 <sup>-/-</sup> + W                               | < 0.01  | < 0.01  | < 0.01  | -                        | -                        | -                        | IL-10 <sup>-/-</sup> + W                            | ns     | ns     | ns     | -                        | -                        | -                        |
| IL-10 <sup>-/-</sup> + E                               | < 0.05  | < 0.05  | < 0.01  | ns                       | -                        | -                        | IL-10 <sup>-/-</sup> + E                            | < 0.01 | < 0.05 | < 0.01 | ns                       | -                        | -                        |
| IL-10 <sup>-/-</sup> + R                               | ns      | ns      | ns      | < 0.01                   | < 0.05                   | -                        | IL-10 <sup>-/-</sup> + R                            | ns     | ns     | ns     | ns                       | < 0.05                   | -                        |
| C                                                      |         |         |         |                          |                          |                          | D                                                   |        |        |        |                          |                          |                          |
| Tissue damage (IL-10 <sup>-/-</sup> )                  |         |         |         |                          |                          |                          | Goblet cells (IL-10 <sup>-/-</sup> )                |        |        |        |                          |                          |                          |
| <i>p</i> -Value                                        | C + W   | C + E   | C + R   | IL-10 <sup>-/-</sup> + W | IL-10 <sup>-/-</sup> + E | IL-10 <sup>-/-</sup> + R | <i>p</i> -Value                                     | C + W  | C + E  | C + R  | IL-10 <sup>-/-</sup> + W | IL-10 <sup>-/-</sup> + E | IL-10 <sup>-/-</sup> + R |
| C + W                                                  | -       | -       | -       | -                        | -                        | -                        | C + W                                               | -      | -      | -      | -                        | -                        | -                        |
| C + E                                                  | ns      | -       | -       | -                        | -                        | -                        | C + E                                               | ns     | -      | -      | -                        | -                        | -                        |
| C + R                                                  | ns      | ns      | -       | -                        | -                        | -                        | C + R                                               | ns     | ns     | -      | -                        | -                        | -                        |
| IL-10 <sup>-/-</sup> + W                               | < 0.001 | < 0.01  | < 0.01  | -                        | -                        | -                        | IL-10 <sup>-/-</sup> + W                            | < 0.05 | < 0.05 | < 0.05 | -                        | -                        | -                        |
| IL-10 <sup>-/-</sup> + E                               | < 0.001 | < 0.001 | < 0.01  | ns                       | -                        | -                        | IL-10 <sup>-/-</sup> + E                            | < 0.01 | < 0.01 | < 0.01 | ns                       | -                        | -                        |
| IL-10 <sup>-/-</sup> + R                               | < 0.05  | ns      | ns      | ns                       | ns                       | -                        | IL-10 <sup>-/-</sup> + R                            | ns     | ns     | ns     | ns                       | ns                       | -                        |
| E                                                      |         |         |         |                          |                          |                          |                                                     |        |        |        |                          |                          |                          |
| Cell infiltration (IL-10 <sup>-/-</sup> )              |         |         |         |                          |                          |                          |                                                     |        |        |        |                          |                          |                          |
| <i>p</i> -Value                                        | C + W   | C + E   | C + R   | IL-10 <sup>-/-</sup> + W | IL-10 <sup>-/-</sup> + E | IL-10 <sup>-/-</sup> + R |                                                     |        |        |        |                          |                          |                          |
| C + W                                                  | -       | -       | -       | -                        | -                        | -                        |                                                     |        |        |        |                          |                          |                          |
| C + E                                                  | ns      | -       | -       | -                        | -                        | -                        |                                                     |        |        |        |                          |                          |                          |
| C + R                                                  | ns      | ns      | -       | -                        | -                        | -                        |                                                     |        |        |        |                          |                          |                          |
| IL-10 <sup>-/-</sup> + W                               | < 0.01  | < 0.01  | < 0.01  | -                        | -                        | -                        |                                                     |        |        |        |                          |                          |                          |
| IL-10 <sup>-/-</sup> + E                               | < 0.01  | < 0.01  | < 0.001 | ns                       | -                        | -                        |                                                     |        |        |        |                          |                          |                          |
| IL-10 <sup>-/-</sup> + R                               | ns      | ns      | < 0.05  | ns                       | ns                       | -                        |                                                     |        |        |        |                          |                          |                          |

**Figure S3.** P-values corresponding to Figure 3 showing MC numbers in duodenum (**A**) and colon (**B**), tissue damage (**C**), goblet cells (**D**) and cell infiltration (**E**). Mice received water (W), 50 mg/kg BW ethanol (E) or 50 mg/kg BW resveratrol (R) via drinking water for 90 days. Group size was n = 5 for wt mice (controls, (C)) and n = 9-10 for IL-10<sup>-/-</sup>, respectively.

# Figure S4

**A**

**B**

| <b><math>\beta</math>-Hexosaminidase release</b> |                |          |                |                | <b><i>Ccl2</i> relative mRNA expression<br/>[% of stimulated control]</b> |                |         |                |                |
|--------------------------------------------------|----------------|----------|----------------|----------------|---------------------------------------------------------------------------|----------------|---------|----------------|----------------|
| <b><i>p</i>-<br/>Value</b>                       | Control +<br>D | IgE/DNP  | IgE/DNP<br>+ D | IgE/DNP<br>+ R | <b><i>p</i>-<br/>Value</b>                                                | Control +<br>D | IgE/DNP | IgE/DNP<br>+ D | IgE/DNP<br>+ R |
| Control +<br>D                                   | -              | -        | -              | -              | Control +<br>D                                                            | -              | -       | -              | -              |
| IgE/DNP                                          | < 0,0001       | -        | -              | -              | IgE/DNP                                                                   | 0,0145         | -       | -              | -              |
| IgE/DNP<br>+ D                                   | < 0,0001       | 0,4262   | -              | -              | IgE/DNP<br>+ D                                                            | 0,0033         | 0,2328  | -              | -              |
| IgE/DNP<br>+ R                                   | 0,0529         | < 0,0001 | < 0,0001       | -              | IgE/DNP<br>+ R                                                            | 0,7206         | 0,0024  | 0,0271         | -              |

**C**

**D**

| <b><i>Tnf-<math>\alpha</math></i> relative mRNA expression<br/>[% of stimulated control]</b> |                |         |                |                | <b><i>Tnf-<math>\alpha</math></i> relative mRNA expression<br/>[% of stimulated control]</b> |                |          |            |            |
|----------------------------------------------------------------------------------------------|----------------|---------|----------------|----------------|----------------------------------------------------------------------------------------------|----------------|----------|------------|------------|
| <b><i>p</i>-<br/>Value</b>                                                                   | Control +<br>D | IgE/DNP | IgE/DNP<br>+ D | IgE/DNP<br>+ R | <b><i>p</i>-<br/>Value</b>                                                                   | Control +<br>D | LPS      | LPS +<br>D | LPS +<br>R |
| Control +<br>D                                                                               | -              | -       | -              | -              | Control +<br>D                                                                               | -              | -        | -          | -          |
| IgE/DNP                                                                                      | 0,004          | -       | -              | -              | LPS                                                                                          | < 0,0001       | -        | -          | -          |
| IgE/DNP<br>+ D                                                                               | < 0,0001       | 0,0166  | -              | -              | LPS + D                                                                                      | < 0,0001       | 0,1047   | -          | -          |
| IgE/DNP<br>+ R                                                                               | 0,707          | 0,0095  | < 0,0001       | -              | LPS + R                                                                                      | 0,5884         | < 0,0001 | < 0,0001   | -          |

**Figure S4.** P-values corresponding to Figure 4 showing  $\beta$ -hexosaminidase release and relative mRNA expression of *Ccl2* and *Tnf- $\alpha$*  in IgE/2,4-dinitrophenyl (DNP)- as well as *Tnf- $\alpha$*  in lipopolysaccharide (LPS)-stimulated bone marrow-derived mast cells (BMMC) treated with resveratrol. Cells were incubated with 50  $\mu$ M resveratrol (R) or the corresponding vehicle control DMSO (D) for 60 min prior to DNP-specific IgE treatment for 60 min and subsequent stimulation with 10  $\mu$ g/ml DNP for 30 min to determine  $\beta$ -hexosaminidase release (**A**) (n = 14) and 90 min for mRNA expression of *Ccl2* (**B**) (n = 3) and *Tnf- $\alpha$*  (**C**) (n = 10). For LPS stimulation, cells were incubated with 50  $\mu$ M resveratrol or the corresponding control DMSO for 60 min prior to treatment with 1  $\mu$ g/ml LPS for 3h to determine *Tnf- $\alpha$*  mRNA expression (**D**) (n = 13).

# Figure S5

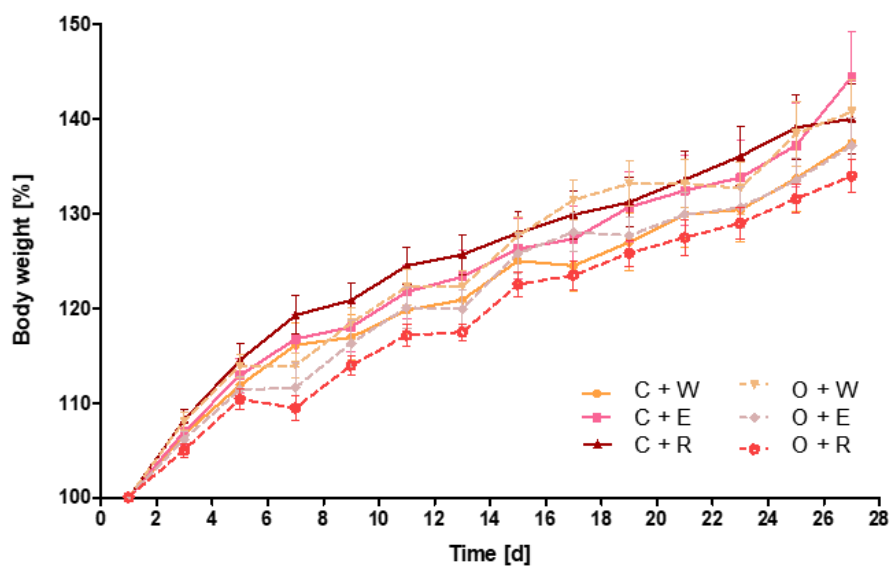

**Figure S5.** Relative body weight course in control mice and Ovalbumin (OVA, O) treated mice for 28 days. Mice received water (W), 50 mg/kg bodyweight (BW) ethanol (E) or 50 mg/kg BW resveratrol(R) via drinking water for 28 days and were intraperitoneally (i.p.) sensitized with 50  $\mu$ g OVA in alum (1:2) on day 5 and 11 and further treated with or without (control, (C)) 50 mg OVA orally on day 15, 18, 20, 22, 24 and 27. Weight was monitored every second day.

## Figure S6

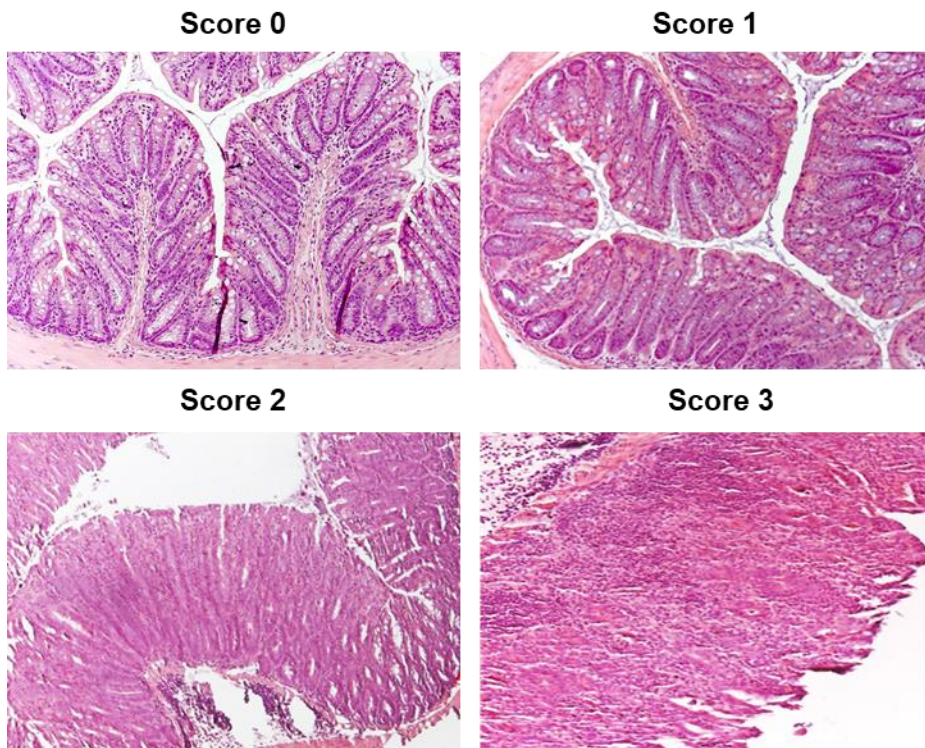

**Figure S6.** Representative pictures of colon tissue from IL-10<sup>-/-</sup> mice treated with resveratrol for analyzing severity of colitis captured as tissue damage, goblet cells and cell infiltration with scores ranging from 0 to 3. Scores were determined in at least three hematoxylin- and eosin-stained tissue sections. Scores contained the following criteria for tissue damage (score 0: undamaged mucosa, 1: single lymphoepithelial damages, 2: surface damages of mucosa, 3: extensive mucosal damage and damage of deeper structures of the intestinal wall), number of goblet cells (score 0: normal; score 1: <50% reduction; score 2: 50-90% reduction; score 3: >90% reduction), and infiltration of inflammatory cells (score 0: low numbers of inflammatory cells in lamina propria; score 1: increased number of inflammatory cells in the lamina propria; score 2: accumulation of inflammatory cells in the lamina propria and infiltration into the submucosa; 3: transmural distribution of inflammatory cells).
